# Supplementary material for: Oxidation stability of confined linear carbon chains, carbon nanotubes, and graphene nanoribbons as 1D nanocarbons
Source: Royal Society of Chemistry journal article supplement (doi:10.1039/c9nr04924j), 2019-01-01
Supplement: c9nr04924j1.pdf [file c9nr04924j1.pdf]

# **Oxidation stability of confined linear carbon chains, carbon nanotubes, and graphene nanoribbons as 1D nanocarbons**

Weili Cui<sup>b</sup>, Takeshi Saito<sup>c</sup>, Paola Ayala<sup>b</sup>, Thomas Pichler<sup>b</sup>, Lei Shi<sup>a,b,\*</sup>

*a. School of Materials Science & Engineering, Sun Yat-sen University, Guangzhou 510275, Guangdong, P. R. China.*

*b. University of Vienna, Faculty of Physics, 1090 Wien, Austria.*

*c. Nanomaterials Research Institute, National Institute of Advanced Industrial Science and Technology (AIST), Tsukuba, Ibaraki 305-8565, Japan.*

*\*Corresponding Author. E-mail: shilei26@mail.sysu.edu.cn (Lei Shi).*

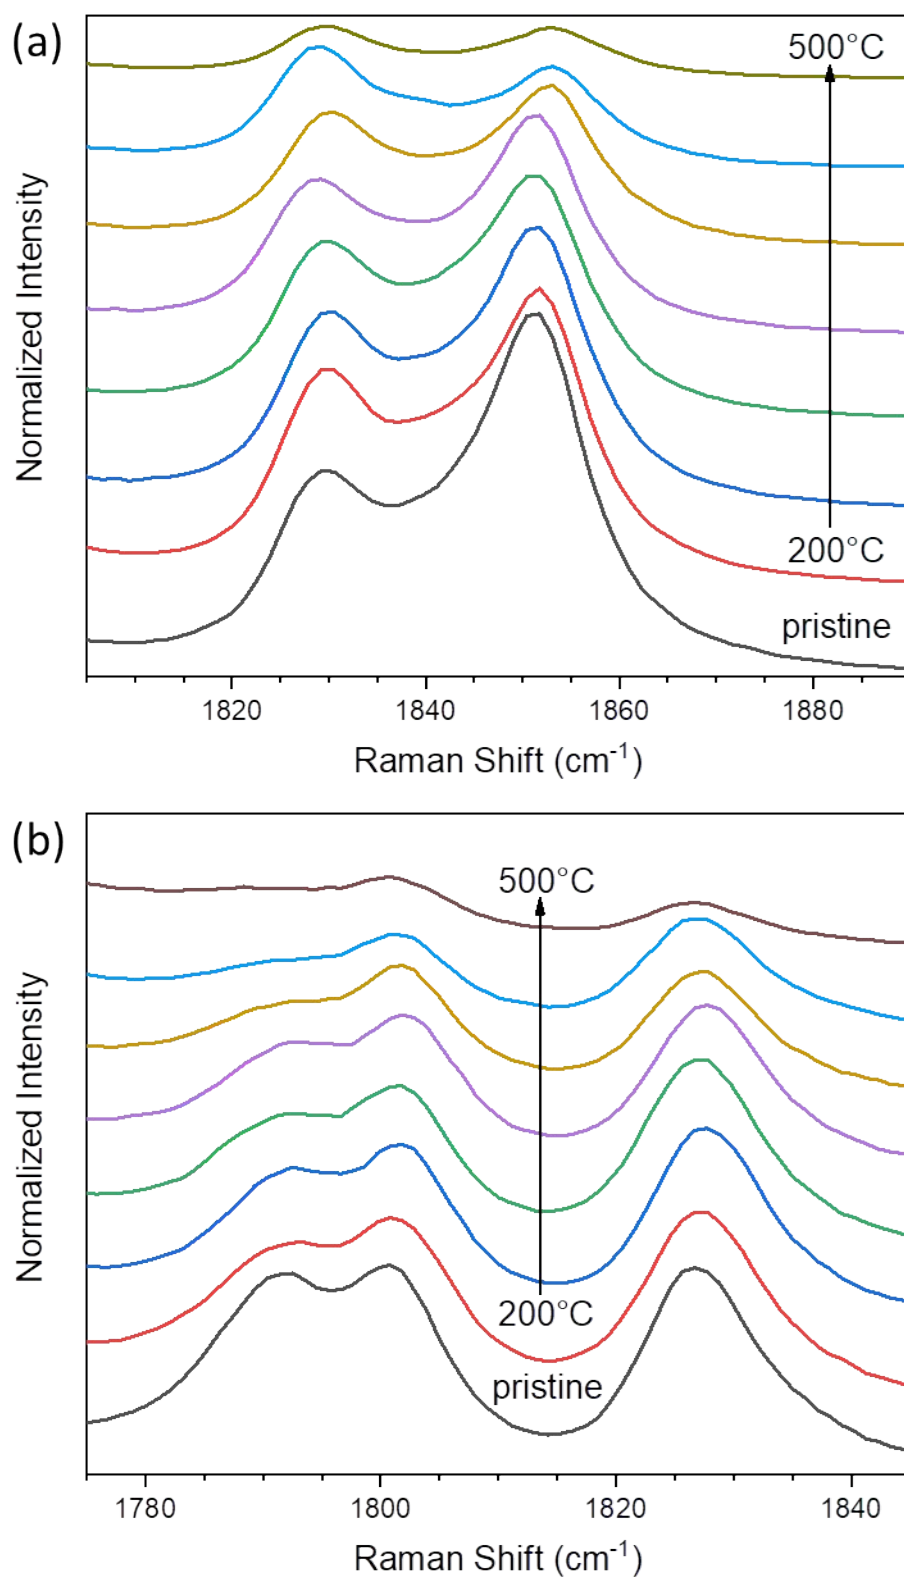

Figure S1. Raman spectra of LCCs with thermal oxidation at temperatures from 200 to 500 °C excited by (a) 568 and (b) 633 nm lasers. The corresponding contour map is shown in **Fig. 2a** and **2b**.

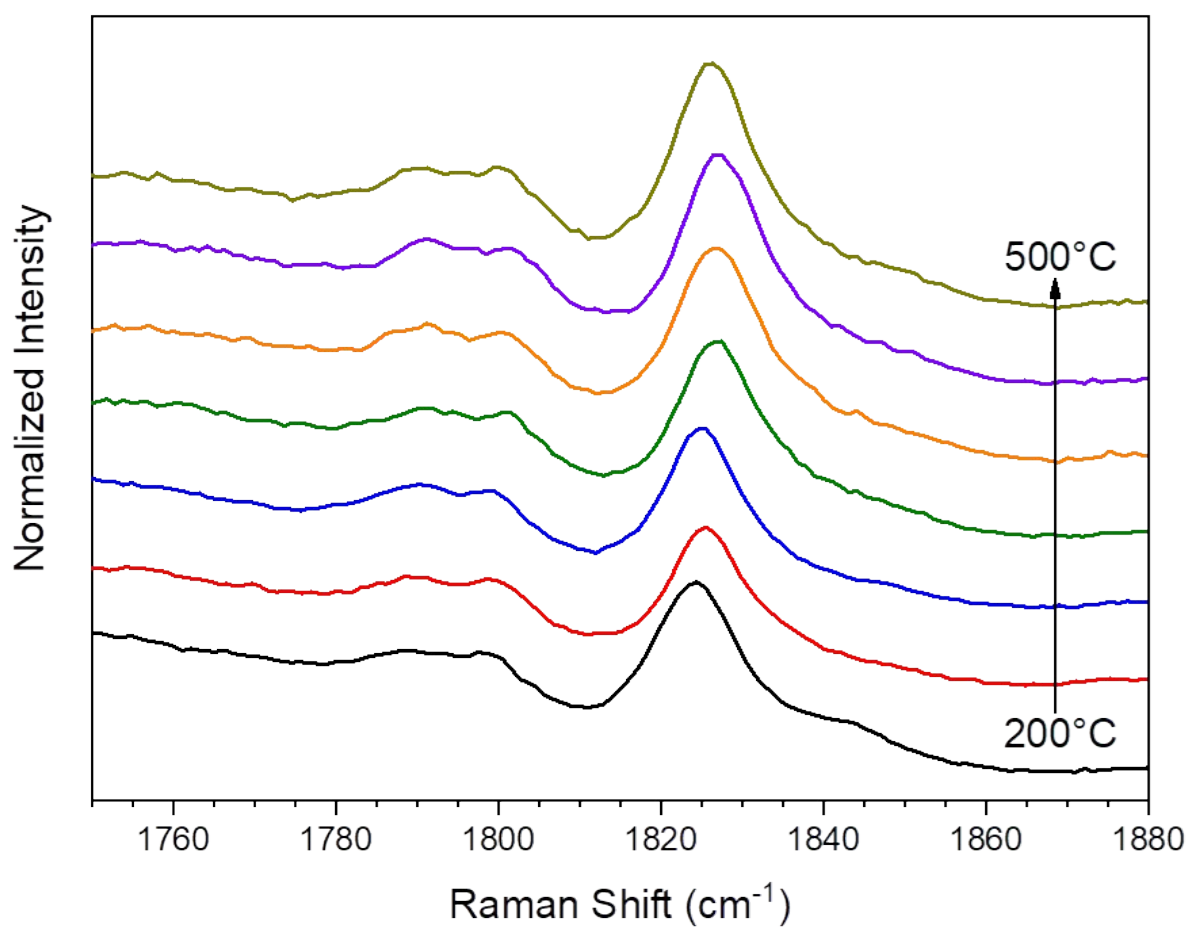

Figure S2. Raman spectra of LCCs before and after annealing in vacuum at temperatures from 200 to 500 °C excited by a 633 nm laser.

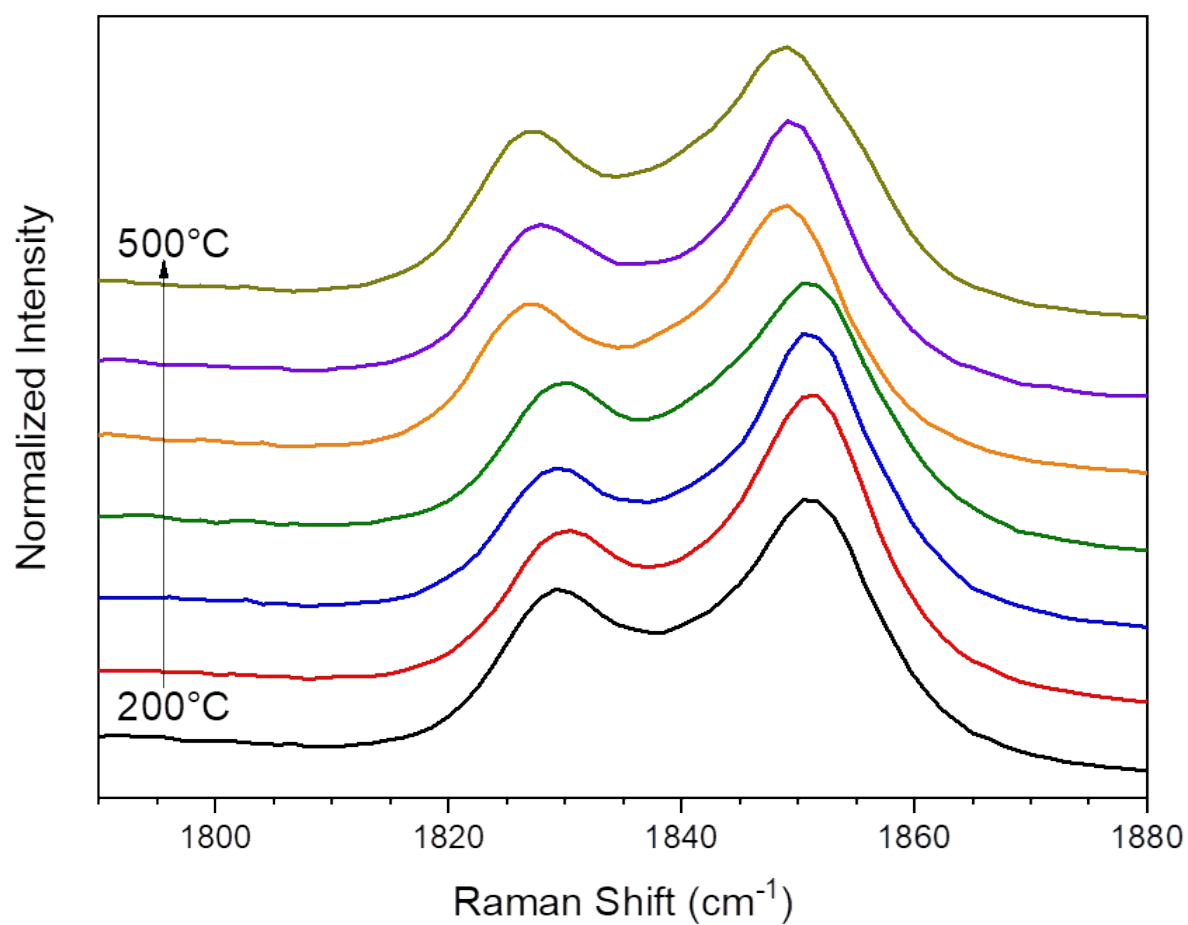

Figure S3. Raman spectra of LCCs before and after annealing in vacuum at temperatures from 200 to 500 °C excited by a 568 nm laser.

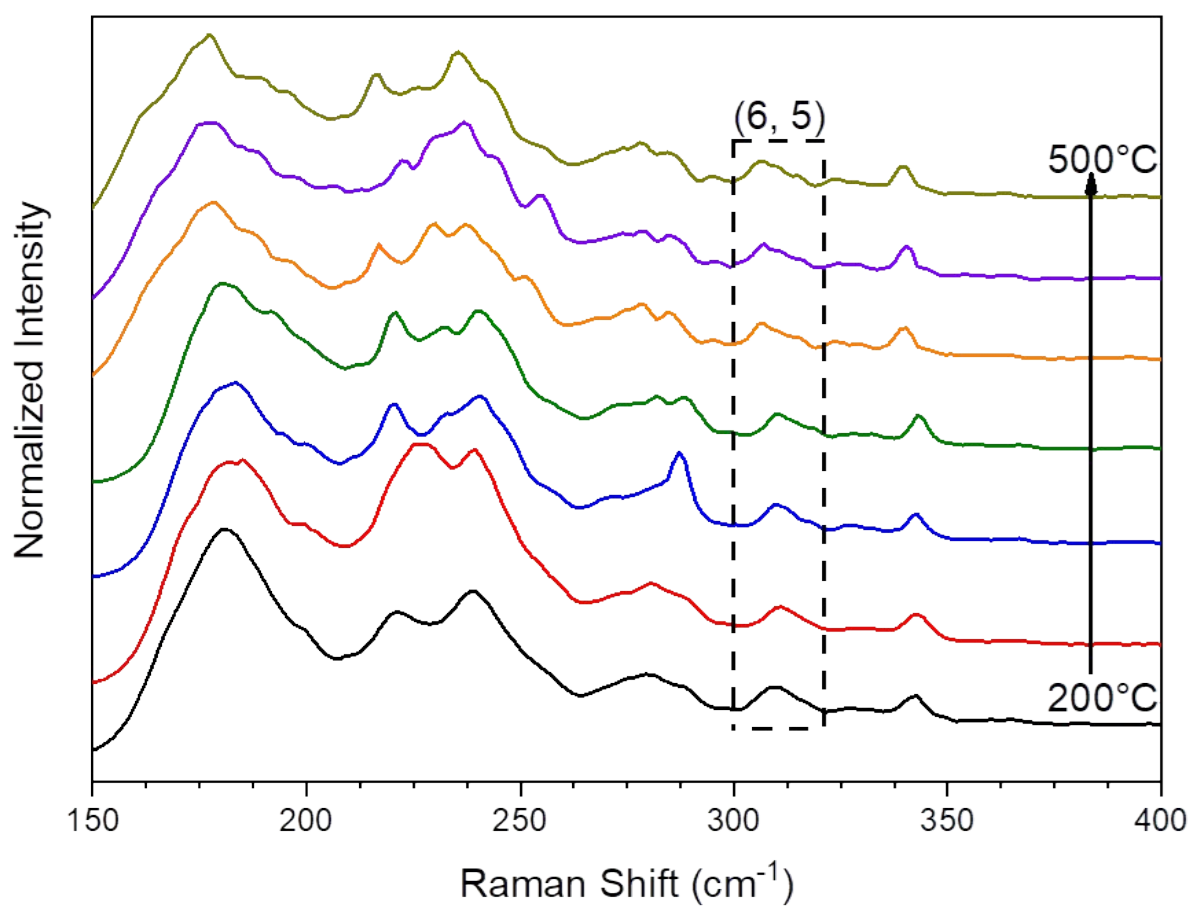

Figure S4. Raman spectra of (6,5) before and after annealing in vacuum at temperatures from 200 to 500 °C excited by a 568 nm laser.

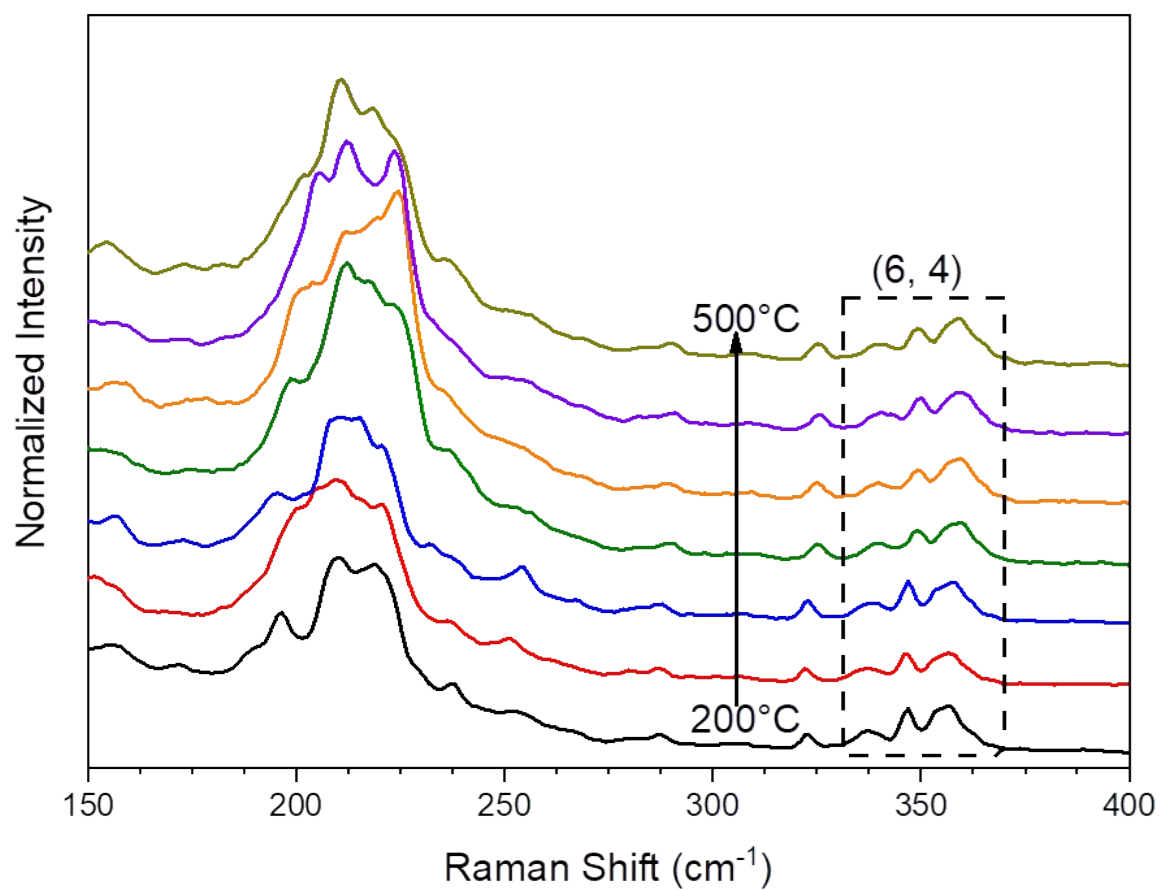

Figure S5. Raman spectra of (6,4) before and after annealing in vacuum at temperatures from 200 to 500 °C excited by a 633 nm laser.

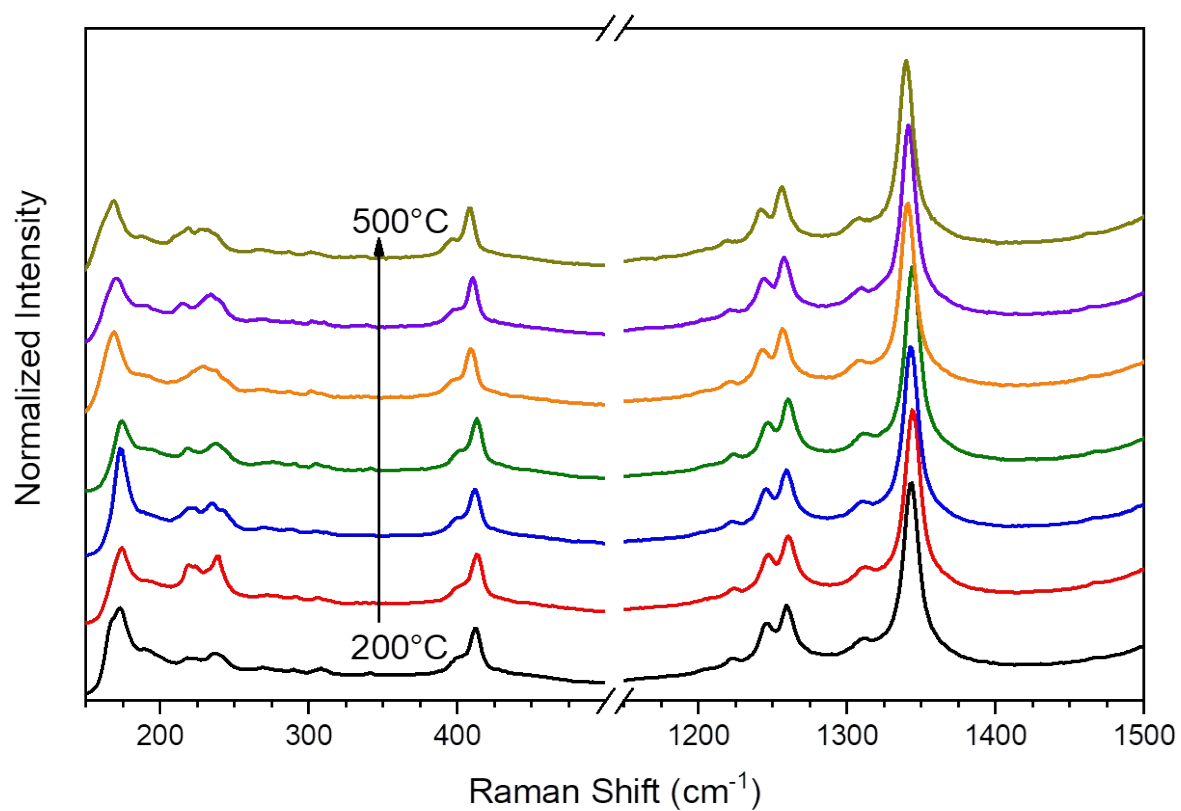

Figure S6. Raman spectra of graphene nanoribbons before and after annealing in vacuum at temperatures from 200 to 500 °C excited by a 568 nm laser.
